# Supplementary material for: Activity Theory as a Theoretical Framework for Health Self-Quantification: A Systematic Review of Empirical Studies
Source: PubMed Central journal article supplement (PMC4909388; doi:10.2196/jmir.5000), 2016-05-27
Supplement: jmir_v18i5e131_app2.pdf [file jmir_v18i5e131_app2.pdf]

| Year            | Reasons for exclusion    |                                                                 |                                                                                                   |
|-----------------|--------------------------|-----------------------------------------------------------------|---------------------------------------------------------------------------------------------------|
| First Author    | Article reference number | Description of the technical aspect of the proposed application | General review of the field, commentary, or discussion of aspects of the Quantified Self movement |
| <b>2015</b>     |                          |                                                                 |                                                                                                   |
| Almalki         | [1]                      |                                                                 | X                                                                                                 |
| Andrieu         | [20]                     |                                                                 | X                                                                                                 |
| Banos           | [21]                     |                                                                 | X                                                                                                 |
| Barricelli      | [22]                     | X                                                               |                                                                                                   |
| Chamberlain     | [23]                     |                                                                 | X                                                                                                 |
| Davies          | [24]                     |                                                                 | X                                                                                                 |
| Doryab          | [25]                     | X                                                               |                                                                                                   |
| Dudley          | [26]                     |                                                                 | X                                                                                                 |
| Forsdyke        | [27]                     |                                                                 | X                                                                                                 |
| Giones-Valls    | [28]                     |                                                                 | X                                                                                                 |
| Hachem          | [29]                     | X                                                               |                                                                                                   |
| Hood            | [30]                     |                                                                 | X                                                                                                 |
| Issa            | [31]                     |                                                                 | X                                                                                                 |
| Janssen         | [32]                     |                                                                 | X                                                                                                 |
| Jones           | [33]                     |                                                                 | X                                                                                                 |
| Lavalliere      | [34]                     |                                                                 | X                                                                                                 |
| Lupton (a)      | [35]                     |                                                                 | X                                                                                                 |
| Lupton (b)      | [36]                     |                                                                 | X                                                                                                 |
| Majmudar        | [37]                     |                                                                 | X                                                                                                 |
| Ohlin           | [38]                     |                                                                 | X                                                                                                 |
| Olivier         | [39]                     |                                                                 | X                                                                                                 |
| Picard          | [40]                     |                                                                 | X                                                                                                 |
| Ruping          | [41]                     |                                                                 | X                                                                                                 |
| Thornquist      | [42]                     |                                                                 | X                                                                                                 |
| Tory            | [43]                     |                                                                 | X                                                                                                 |
| Van den Bulck   | [44]                     |                                                                 | X                                                                                                 |
| Williams        | [45]                     |                                                                 | X                                                                                                 |
| Zandi           | [46]                     | X                                                               |                                                                                                   |
| <b>2014</b>     |                          |                                                                 |                                                                                                   |
| Almalki         | [155]                    |                                                                 | X                                                                                                 |
| Appelboom       | [47]                     |                                                                 | X                                                                                                 |
| Becker          | [48]                     |                                                                 | X                                                                                                 |
| Brennan         | [49]                     | X                                                               |                                                                                                   |
| Bushhousen      | [50]                     |                                                                 | X                                                                                                 |
| Caldwell        | [51]                     |                                                                 | X                                                                                                 |
| Calikli         | [52]                     |                                                                 | X                                                                                                 |
| Cena            | [53]                     |                                                                 | X                                                                                                 |
| Clifford        | [54]                     |                                                                 | X                                                                                                 |
| Cuttone (a)     | [55]                     | X                                                               |                                                                                                   |
| Cuttone (b)     | [56]                     |                                                                 | X                                                                                                 |
| De Croon        | [57]                     |                                                                 | X                                                                                                 |
| Duarte          | [58]                     | X                                                               |                                                                                                   |
| Gastaldi        | [59]                     |                                                                 | X                                                                                                 |
| Gaunt           | [60]                     | X                                                               |                                                                                                   |
| Gurrin          | [61]                     |                                                                 | X                                                                                                 |
| Harrison        | [62]                     |                                                                 | X                                                                                                 |
| Hirsch          | [63]                     | X                                                               |                                                                                                   |
| Hogenboom       | [64]                     | X                                                               |                                                                                                   |
| Huang           | [65]                     | X                                                               |                                                                                                   |
| Jain            | [66]                     |                                                                 | X                                                                                                 |
| Jones           | [67]                     |                                                                 | X                                                                                                 |
| Jordan          | [68]                     |                                                                 | X                                                                                                 |
| Keary           | [69]                     |                                                                 | X                                                                                                 |
| Khorakhun       | [70]                     |                                                                 | X                                                                                                 |
| Kido            | [71]                     | X                                                               |                                                                                                   |
| Lagus           | [72]                     |                                                                 | X                                                                                                 |
| Laundav         | [73]                     | X                                                               |                                                                                                   |
| Lee             | [74]                     |                                                                 | X                                                                                                 |
| Lingg           | [75]                     | X                                                               |                                                                                                   |
| Lupton (a)      | [76]                     |                                                                 | X                                                                                                 |
| Lupton (b)      | [77]                     |                                                                 | X                                                                                                 |
| Lupton (c)      | [3]                      |                                                                 | X                                                                                                 |
| Marcengo        | [78]                     | X                                                               |                                                                                                   |
| Maturo (a)      | [79]                     |                                                                 | X                                                                                                 |
| Maturo (b)      | [80]                     |                                                                 | X                                                                                                 |
| Meyer           | [81]                     |                                                                 | X                                                                                                 |
| Nafus           | [82]                     |                                                                 | X                                                                                                 |
| Nikolic-Popovic | [83]                     | X                                                               |                                                                                                   |
| Prince          | [84]                     |                                                                 | X                                                                                                 |
| Rapp (a)        | [85]                     |                                                                 | X                                                                                                 |
| Rapp (b)        | [86]                     |                                                                 | X                                                                                                 |
| Reigeluth       | [87]                     |                                                                 | X                                                                                                 |
| Salamati        | [88]                     |                                                                 | X                                                                                                 |
| Saunders        | [11]                     | X                                                               |                                                                                                   |
| Schreier        | [89]                     |                                                                 | X                                                                                                 |
| Shull           | [90]                     |                                                                 | X                                                                                                 |
| Sjöklint        | [91]                     |                                                                 | X                                                                                                 |

|                |       |   |   |
|----------------|-------|---|---|
| Wenger         | [92]  | X |   |
| Zhu            | [93]  | X |   |
| <b>2013</b>    |       |   |   |
| Altini         | [94]  | X |   |
| Buzzo          | [95]  | X |   |
| Calvo          | [96]  |   | X |
| Chen           | [97]  | X |   |
| Cuttone        | [98]  | X |   |
| Derksen        | [99]  | X |   |
| Jain           | [100] |   | X |
| Kido           | [101] | X |   |
| Kunze          | [102] | X |   |
| Lupton         | [103] |   | X |
| Lupton         | [104] |   | X |
| Martin-Sanchez | [105] |   | X |
| Matassa        | [106] | X |   |
| McFedries      | [107] |   | X |
| Pasek          | [108] |   | X |
| Salamati       | [109] | X |   |
| Swan           | [110] |   | X |
| Yumak          | [111] |   | X |
| <b>2012</b>    |       |   |   |
| Bottles        | [112] |   | X |
| Lathia         | [113] | X |   |
| Lathia         | [114] | X |   |
| Li             | [115] |   | X |
| Smarr          | [116] |   | X |
| Rivera-Pelayo  | [117] |   | X |
| Swan (a)       | [118] |   | X |
| Swan (b)       | [119] |   | X |
| Swan (c)       | [120] |   | X |
| The Economist  | [121] |   | X |
| <b>2009</b>    |       |   |   |
| Swan           | [122] |   | X |
